# Supplementary material for: Occult Vertebral Fracture (OVF) in Patients Who Underwent Hepatectomy for Colorectal Liver Metastasis: Strong Association with Oncological Outcomes
Source: MDPI journal article supplement (doi:10.3390/cancers15235513), 2023-11-22

**Supplement Figure S1.** Kaplan–Meier curve for cancer specific survival after hepatic resection for colorectal liver metastases according to the treatment of recurrence. (A) Non-occult vertebral fracture (OVF) group (B) occult vertebral fracture (OVF) group

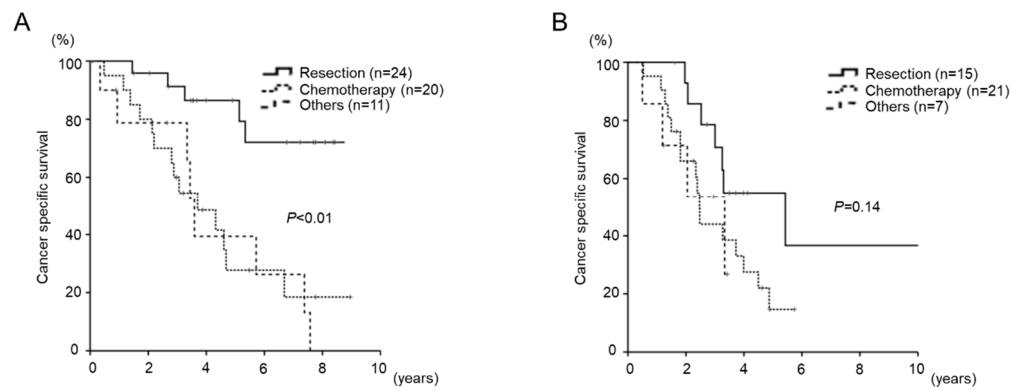

Supplement: s1 [file s1]
